# Supplementary material
Source: ML conference proceedings conference paper supplement (https://proceedings.neurips.cc/paper_files/paper/2016/hash/abd815286ba1007abfbb8415b83ae2cf-Abstract.html)
Supplement: Supplementary file 1 [file abd815286ba1007abfbb8415b83ae2cf-Supplemental.zip]

Archive with 1 entries (1 files):
- supplementary.pdf
